# Supplementary material for: Measuring Italian citizens’ engagement in the first wave of the COVID-19 pandemic containment measures: A cross-sectional study
Source: PLoS One. 2020 Sep 11;15(9):e0238613. doi: 10.1371/journal.pone.0238613 (PMC7485890; doi:10.1371/journal.pone.0238613)
Supplement: S3 Appendix — (PDF) [file pone.0238613.s003.pdf]

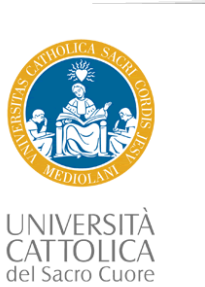

UNIVERSITÀ CATTOLICA DEL SACRO CUORE

20123 MILANO – LARGO A. GEMELLI 1

**Dipartimento di Psicologia**

**Università Cattolica del Sacro Cuore**

**Commissione Etica per la Ricerca in Psicologia (CERPS)**

**Dichiarazione di Approvazione della Commissione etica - CERPS**

Titolo della ricerca: **Monitoraggio sui consumi alimentari degli italiani in una prospettiva di psicologia dei consumi**

*Proponenti:* Guendalina Graffigna

*Altri proponenti:* Maria Grazia Savarese

*data di sottomissione:* 30 ottobre 2019

*data di approvazione:* 15 gennaio 2020

*numero protocollo:* 02-20

**In merito allo studio in oggetto, la commissione etica ha valutato i seguenti documenti:**

- **Modulo richiesta**
- **Questionario**
- **Consenso informato**

**La commissione etica ha espresso all'unanimità parere favorevole allo studio**

***Si produce la seguente per gli adempimenti del caso, secondo le rispettive competenze***

**Il Presidente del CERPS**

**Direttore del Dipartimento di Psicologia**

Prof. Camillo Regalia

Prof. Alessandro Antonietti

**Milano 22 giugno 2020**
